# Supplementary material for: Formation of an MoTe2 based Schottky junction employing ultra-low and high resistive metal contacts
Source: Royal Society of Chemistry journal article supplement (doi:10.1039/c8ra09656b), 2019-01-01
Supplement: c8ra09656b1.pdf [file c8ra09656b1.pdf]

## Supplementary Information

### Formation of MoTe<sub>2</sub> Based Schottky Junction Employing Ultra-low and High Resistive Metal Contacts

Sikandar Aftab<sup>a</sup>, Muhammad Waqas Iqbal<sup>b\*</sup>, Amir Muhammad Afzal<sup>a</sup>, M. Farooq Khan<sup>a</sup>, Muhammad Waqas Iqbal<sup>b\*</sup>, Ghulam Hussain<sup>b</sup>, Hafiza Sumaira Waheed<sup>b</sup> Muhammad Arshad Kamran<sup>c</sup>

<sup>a</sup>Department of Physics & Astronomy and Graphene Research Institute, Sejong University, Seoul 05006, Korea

<sup>b</sup>Department of Physics, Riphah Institute of Computing and Applied Sciences (RICAS), Riphah International University, 14 Ali Road, Lahore, Pakistan

<sup>c</sup>Department of Physics, College of Science, Majmaah University, P.O. Box no. 1712, Al-Zulfi 11932, Saudi Arabia.

E-mail: [waqas.iqbal@riphah.edu.pk](mailto:waqas.iqbal@riphah.edu.pk)

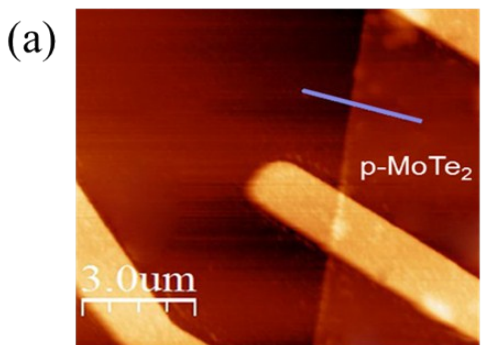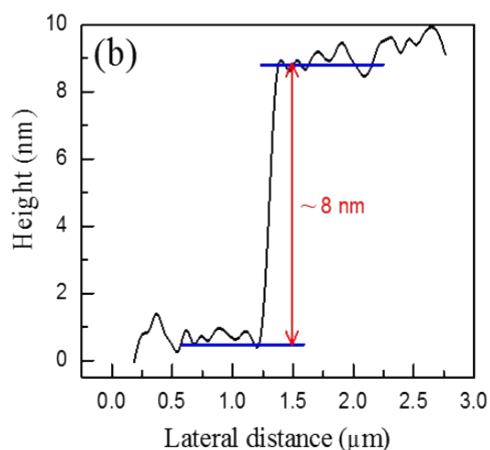

**Figure S1.** (a) Typical AFM image of p-MoTe<sub>2</sub> Schottky junction on SiO<sub>2</sub>/p<sup>+</sup> - Si substrate. Corresponding step height profile from the AFM lines scan as shown. The p-MoTe<sub>2</sub> flakes have a thickness of ~8 nm.

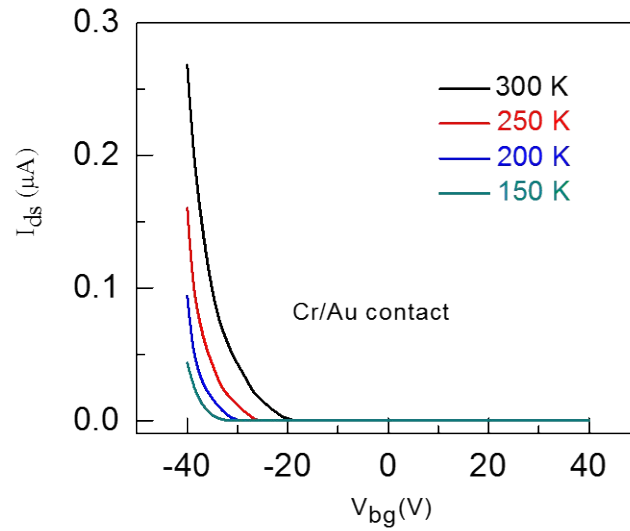

**Figure S2.** Transfer characteristics at different temperatures with Cr/Au metal contacts.

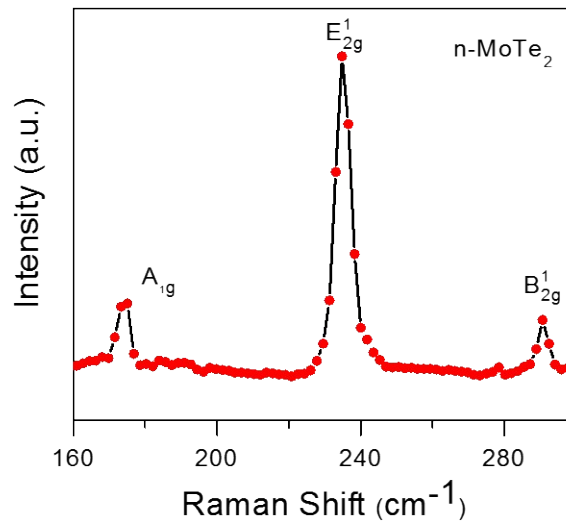

**Figure S3.** Raman spectra of p-MoTe<sub>2</sub> nano-flakes.
